# Supplementary material
Source: PubMed Central journal article supplement (PMC3923574)
Supplement: NIHMS548932-supplement-supplement_1.pdf [file NIHMS548932-supplement-supplement_1.pdf]

**Supplement Table 1** Comparison of baseline characteristics between completers and non-completers

|                                                           | Completers<br>n=194 | Non-completers<br>n=8 | P-value     |
|-----------------------------------------------------------|---------------------|-----------------------|-------------|
| <b>Study arm, n (%)</b>                                   |                     |                       |             |
| Exercise group                                            | 94 (48.5)           | 6 (75.0)              | 0.17        |
| Control group                                             | 100 (51.5)          | 2 (25.0)              |             |
| <b>Demographic and medical factors</b>                    |                     |                       |             |
| Age (years), Mean(SD)                                     | 55.4 (6.9)          | 52.6 (5.5)            | 0.26        |
| Female, n(%)                                              | 94 (48.5)           | 6 (75.0)              | 0.17        |
| Race (non-Hispanic white), n(%)                           | 178 (94.1)          | 7 (87.4)              | 0.51        |
| College degree, n(%)                                      | 117 (60.3)          | 6 (75.0)              | 0.49        |
| Post-menopause, n(%)                                      | 60 (63.8)           | 3 (50.0)              | 0.67        |
| Colon polyp Hx, n(%)                                      | 110 (56.7)          | 5 (62.5)              | 1.00        |
| <b>Medication use, n(%)</b>                               |                     |                       |             |
| Antidepressants                                           | 33 (17.0)           | 1 (12.5)              | 1.00        |
| Anxiolytics                                               | 3 (1.6)             | 0 (0.0)               | 1.00        |
| <b>Anthropometrics and Lifestyle factors</b>              |                     |                       |             |
| BMI (kg/m <sup>2</sup> ), Mean(SD)                        | 29.3 (4.7)          | 30.0 (5.3)            | 0.66        |
| Smoker, n(%)                                              | 11 (5.7)            | 1 (12.5)              | 0.39        |
| VO <sub>2max</sub> (ml/kg/min), Mean(SD)                  | 27.4 (6.3)          | 24.4 (4.8)            | 0.18        |
| Moderate-to-vigorous PA (min/week), Mean(SD)              | 58.3 (88.8)         | 24.8 (44.8)           | 0.29        |
| Pedometer count (steps/day), Mean(SD)                     | 6287 (2824)         | 3656 (3332)           | <b>0.02</b> |
| <b>Psychosocial factors, Mean (SD)</b>                    |                     |                       |             |
| Exercise self-efficacy (score range 0-55)                 | 43.6 (9.8)          | 48.4 (6.4)            | 0.17        |
| <b>Health-related quality of life (score range 0-100)</b> |                     |                       |             |
| Physical functioning                                      | 90.6 (10.6)         | 86.3 (17.9)           | 0.52        |
| Role-physical                                             | 86.3 (24.7)         | 84.4 (22.9)           | 0.83        |
| Bodily pain                                               | 79.0 (17.3)         | 73.6 (17.4)           | 0.39        |
| Vitality                                                  | 56.0 (14.7)         | 46.6 (22.5)           | 0.09        |
| General health                                            | 57.2 (6.9)          | 55.9 (7.6)            | 0.61        |
| Social functioning                                        | 91.4 (13.6)         | 76.6 (25.4)           | 0.14        |
| Role-emotional                                            | 88.3 (23.3)         | 54.2 (50.2)           | 0.10        |
| Mental health                                             | 80.0 (11.7)         | 72.0 (15.7)           | 0.06        |

Fisher's exact test was used due to small number of non-completers

**Supplement figure 1** Baseline and 12-month HRQOL and exercise self-efficacy scores stratified by adherence

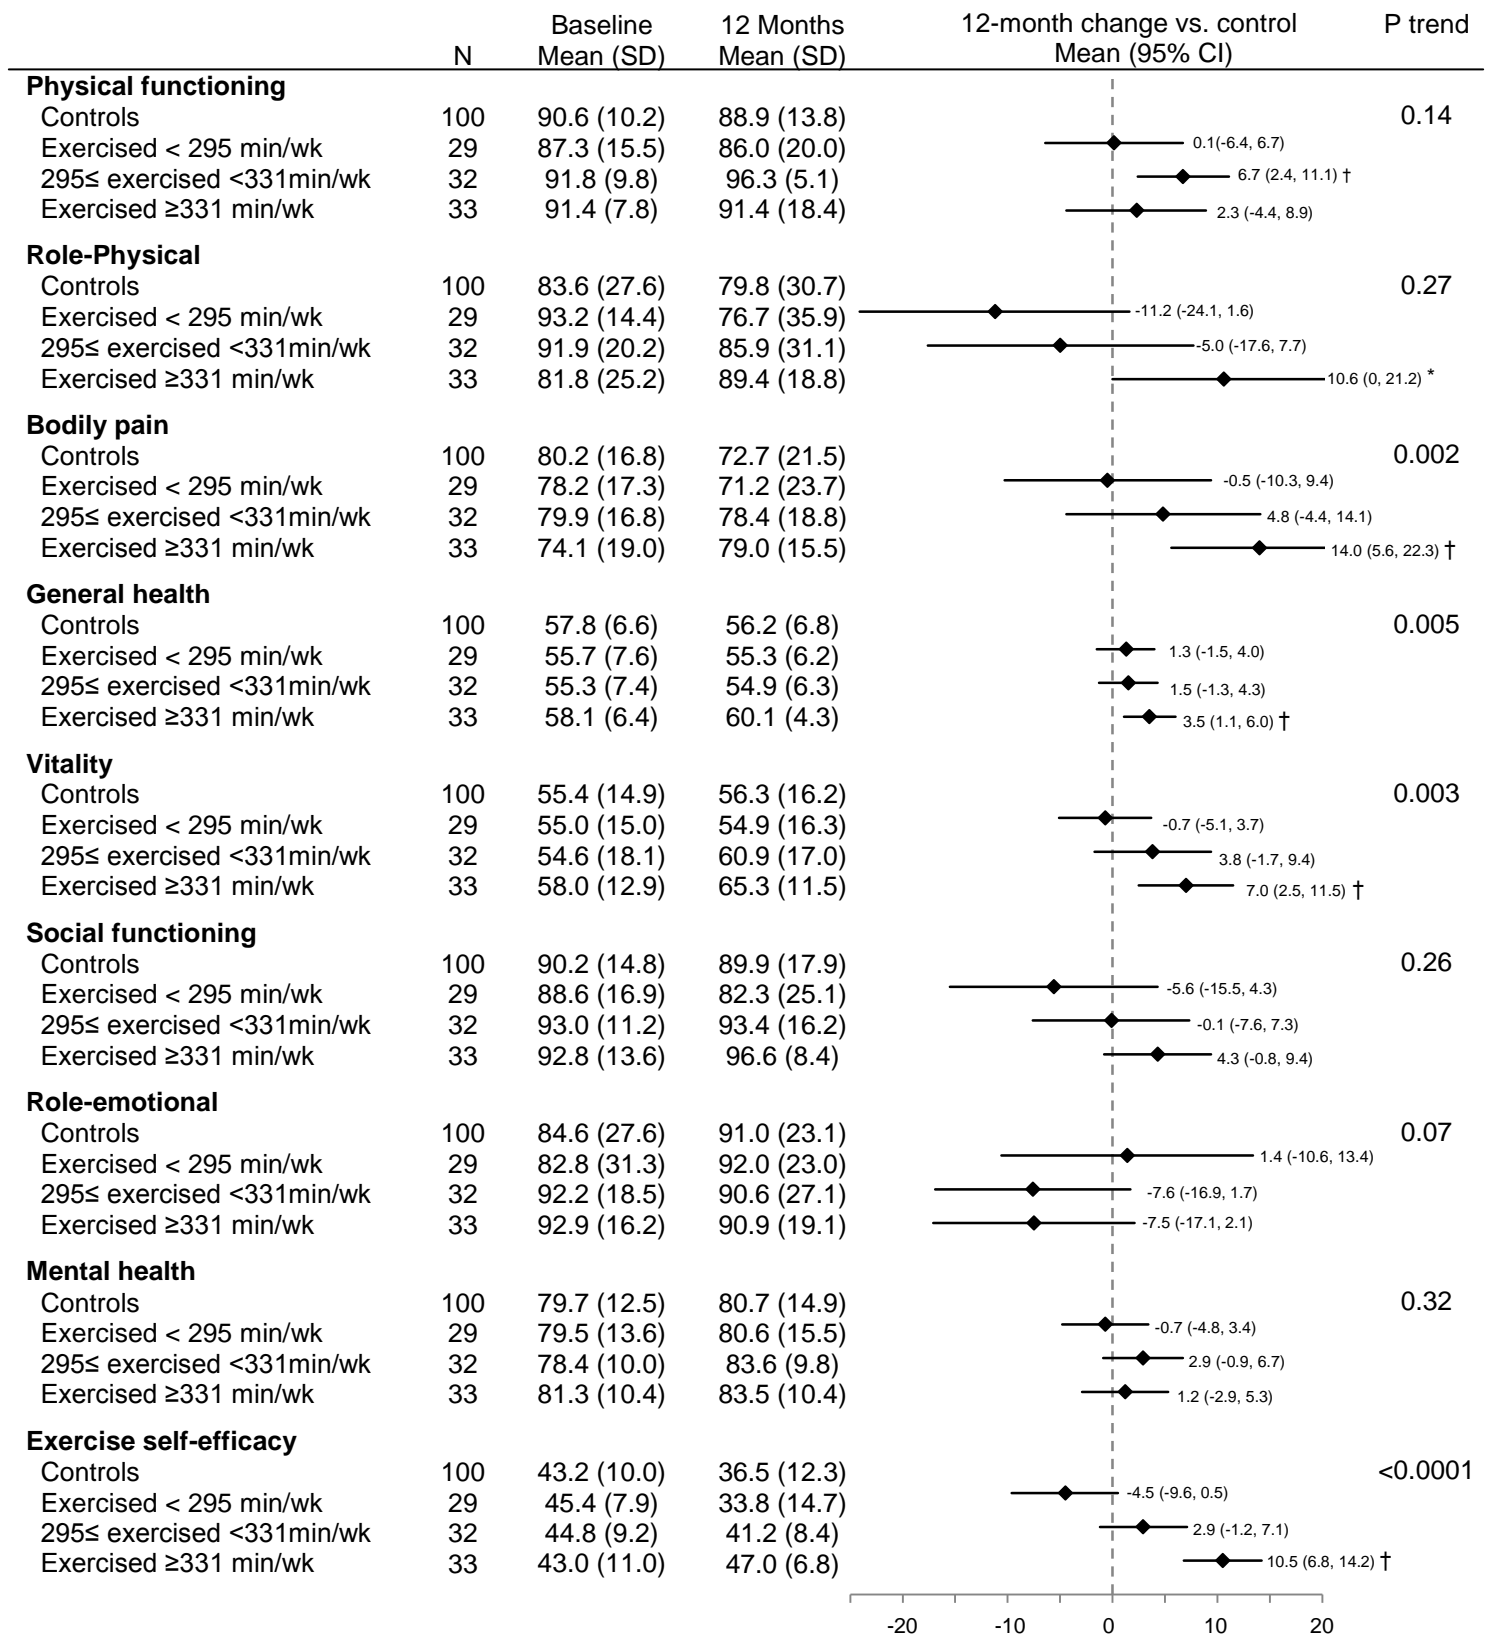

N indicates a number of participants who had 12-month data on health-related quality of life and exercise self-efficacy outcomes. All participants had baseline data on health-related quality of life and exercise self-efficacy outcomes  
 $P_{\text{trend}}$  testing a trend in change from baseline to 12 months across subgroups, adjusting for age, gender, and antidepressant use  
 a:  $p < 0.05$ , b:  $p < 0.01$ . P value comparing changes in HRQOL and exercise self-efficacy scores from baseline to 12 months between each adherence subgroup vs. controls, adjusting for age, gender, and antidepressant use

**Supplement figure 2** Baseline and 12-month HRQOL and exercise self-efficacy scores stratified by percent changes in cardiopulmonary fitness ( $VO_{2max}$ )

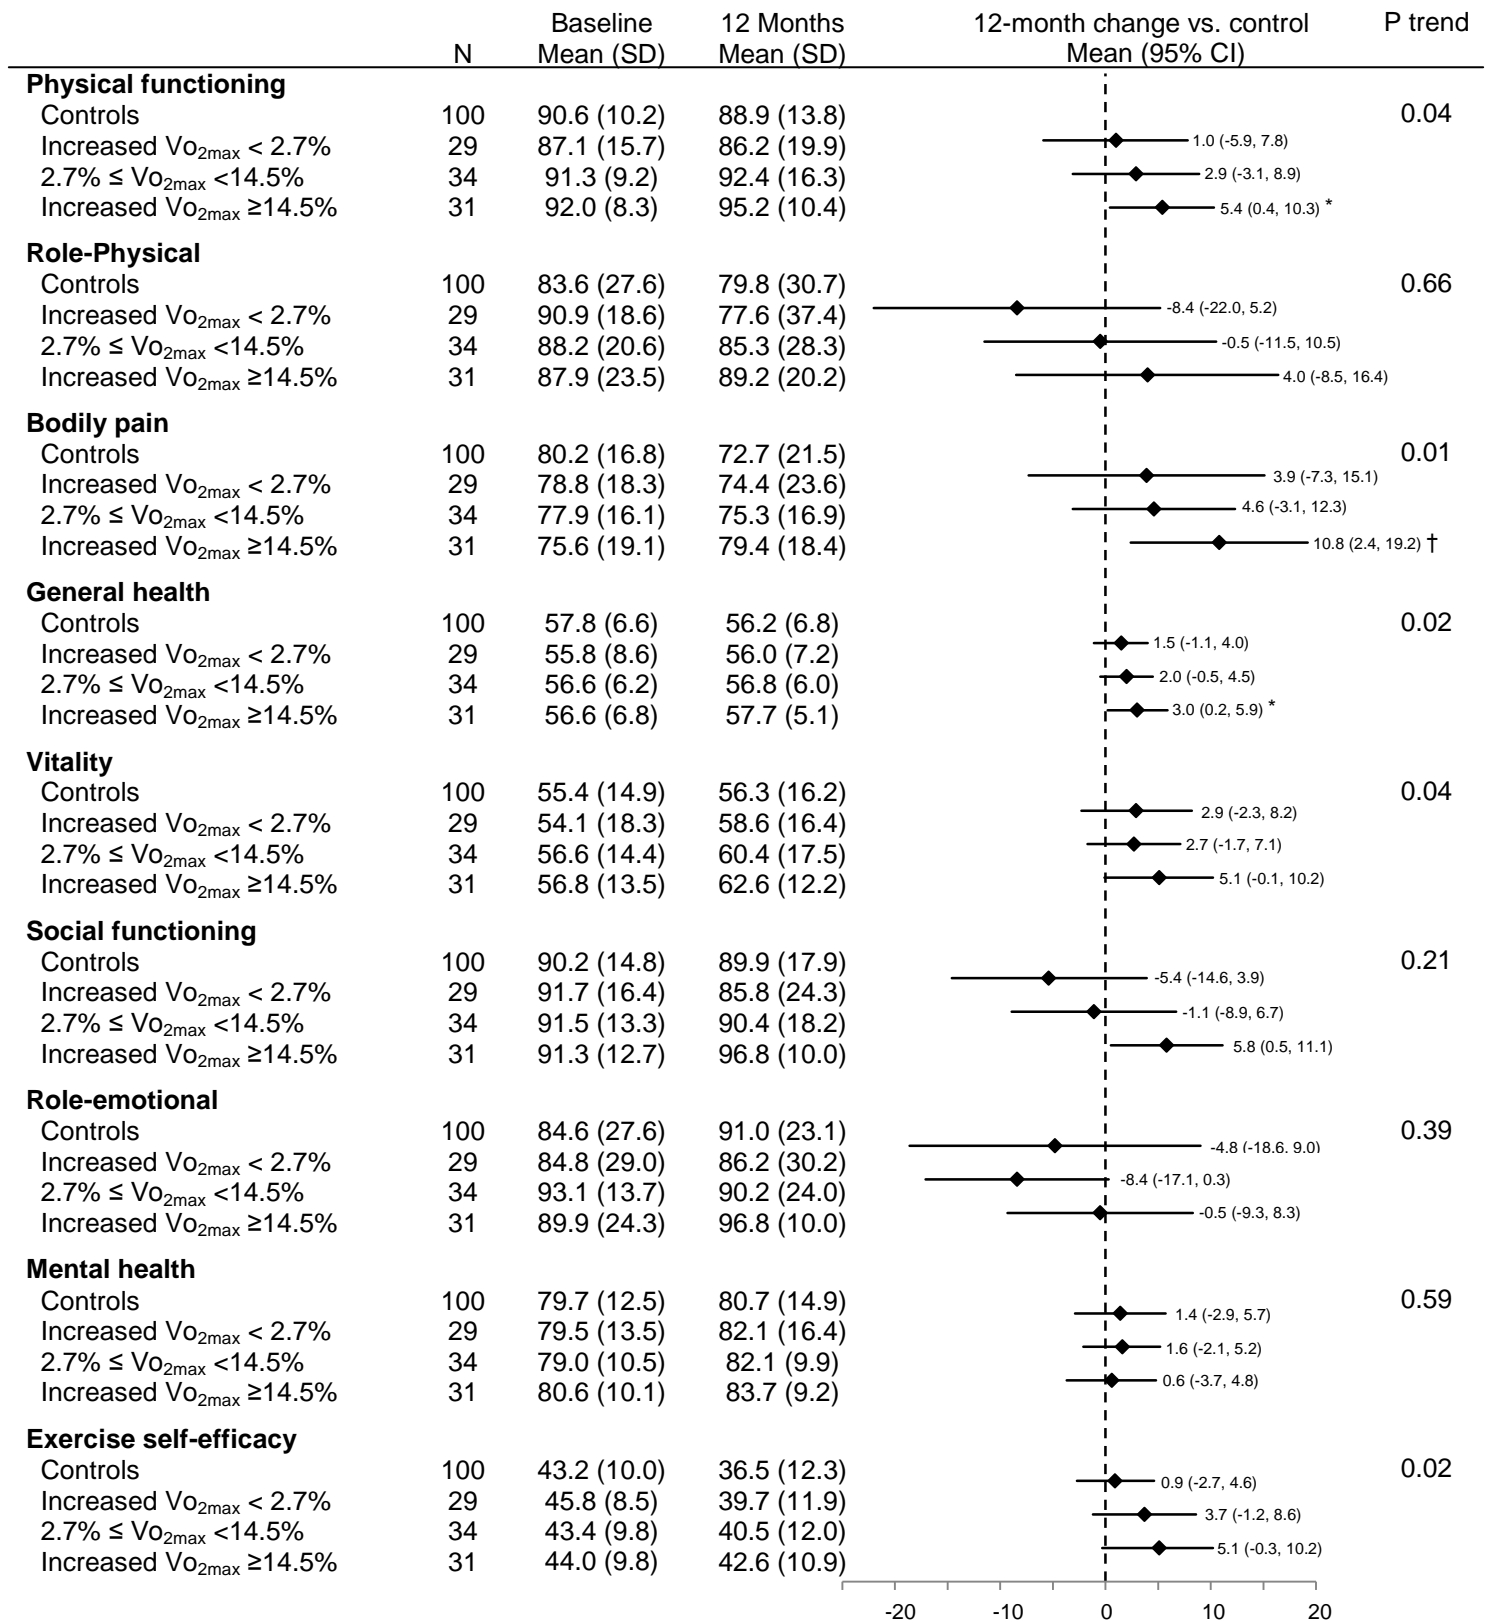

N indicates a number of participants who had 12-month data on health-related quality of life and exercise self-efficacy outcomes. All participants had baseline data on health-related quality of life and exercise self-efficacy outcomes

$P_{trend}$  testing a trend in change from baseline to 12 months across subgroups, adjusting for age, gender, and antidepressant use

\*:  $p < 0.05$ , †:  $p < 0.01$ . P value comparing changes in HRQOL and exercise self-efficacy scores from baseline to 12 months between each adherence subgroup vs. controls, adjusting for age, gender, and antidepressant use

**Supplement figure 3** Baseline and 12-month HRQOL and exercise self-efficacy scores stratified by percent changes in body weight

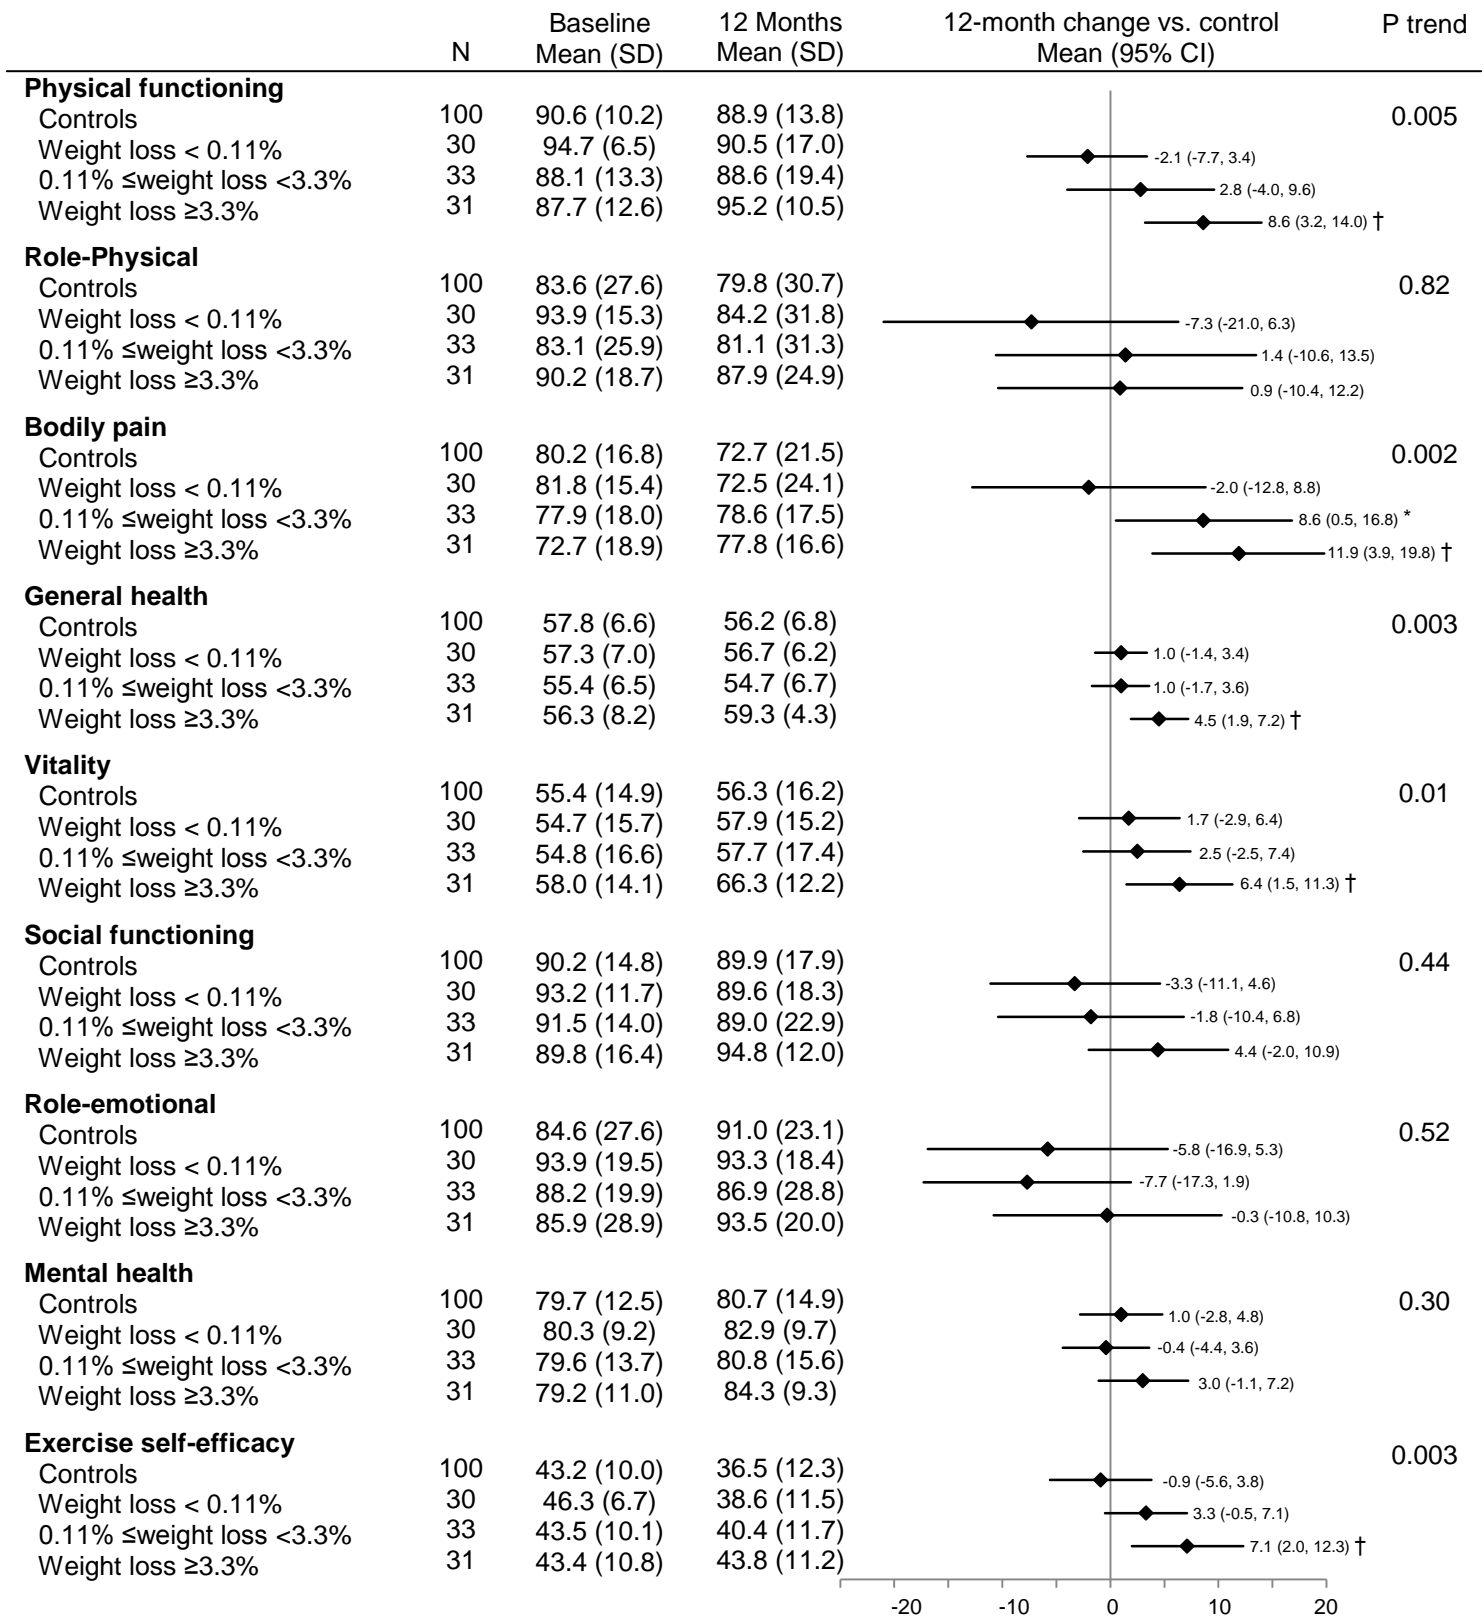

N indicates a number of participants who had 12-month data on health-related quality of life and exercise self-efficacy outcomes. All participants had baseline data on health-related quality of life and exercise self-efficacy outcomes

P<sub>trend</sub> tested a trend in change from baseline to 12 months across subgroups, adjusting for age, gender, and antidepressant use

\*: p<0.05, †: p<0.01. P value compared changes in HRQOL and exercise self-efficacy scores from baseline to 12 months between each adherence subgroup vs. controls, adjusting for age, gender, and antidepressant use

**Supplement figure 4** Baseline and 12-month HRQOL and exercise self-efficacy scores stratified by percent changes in waist circumference (WC)

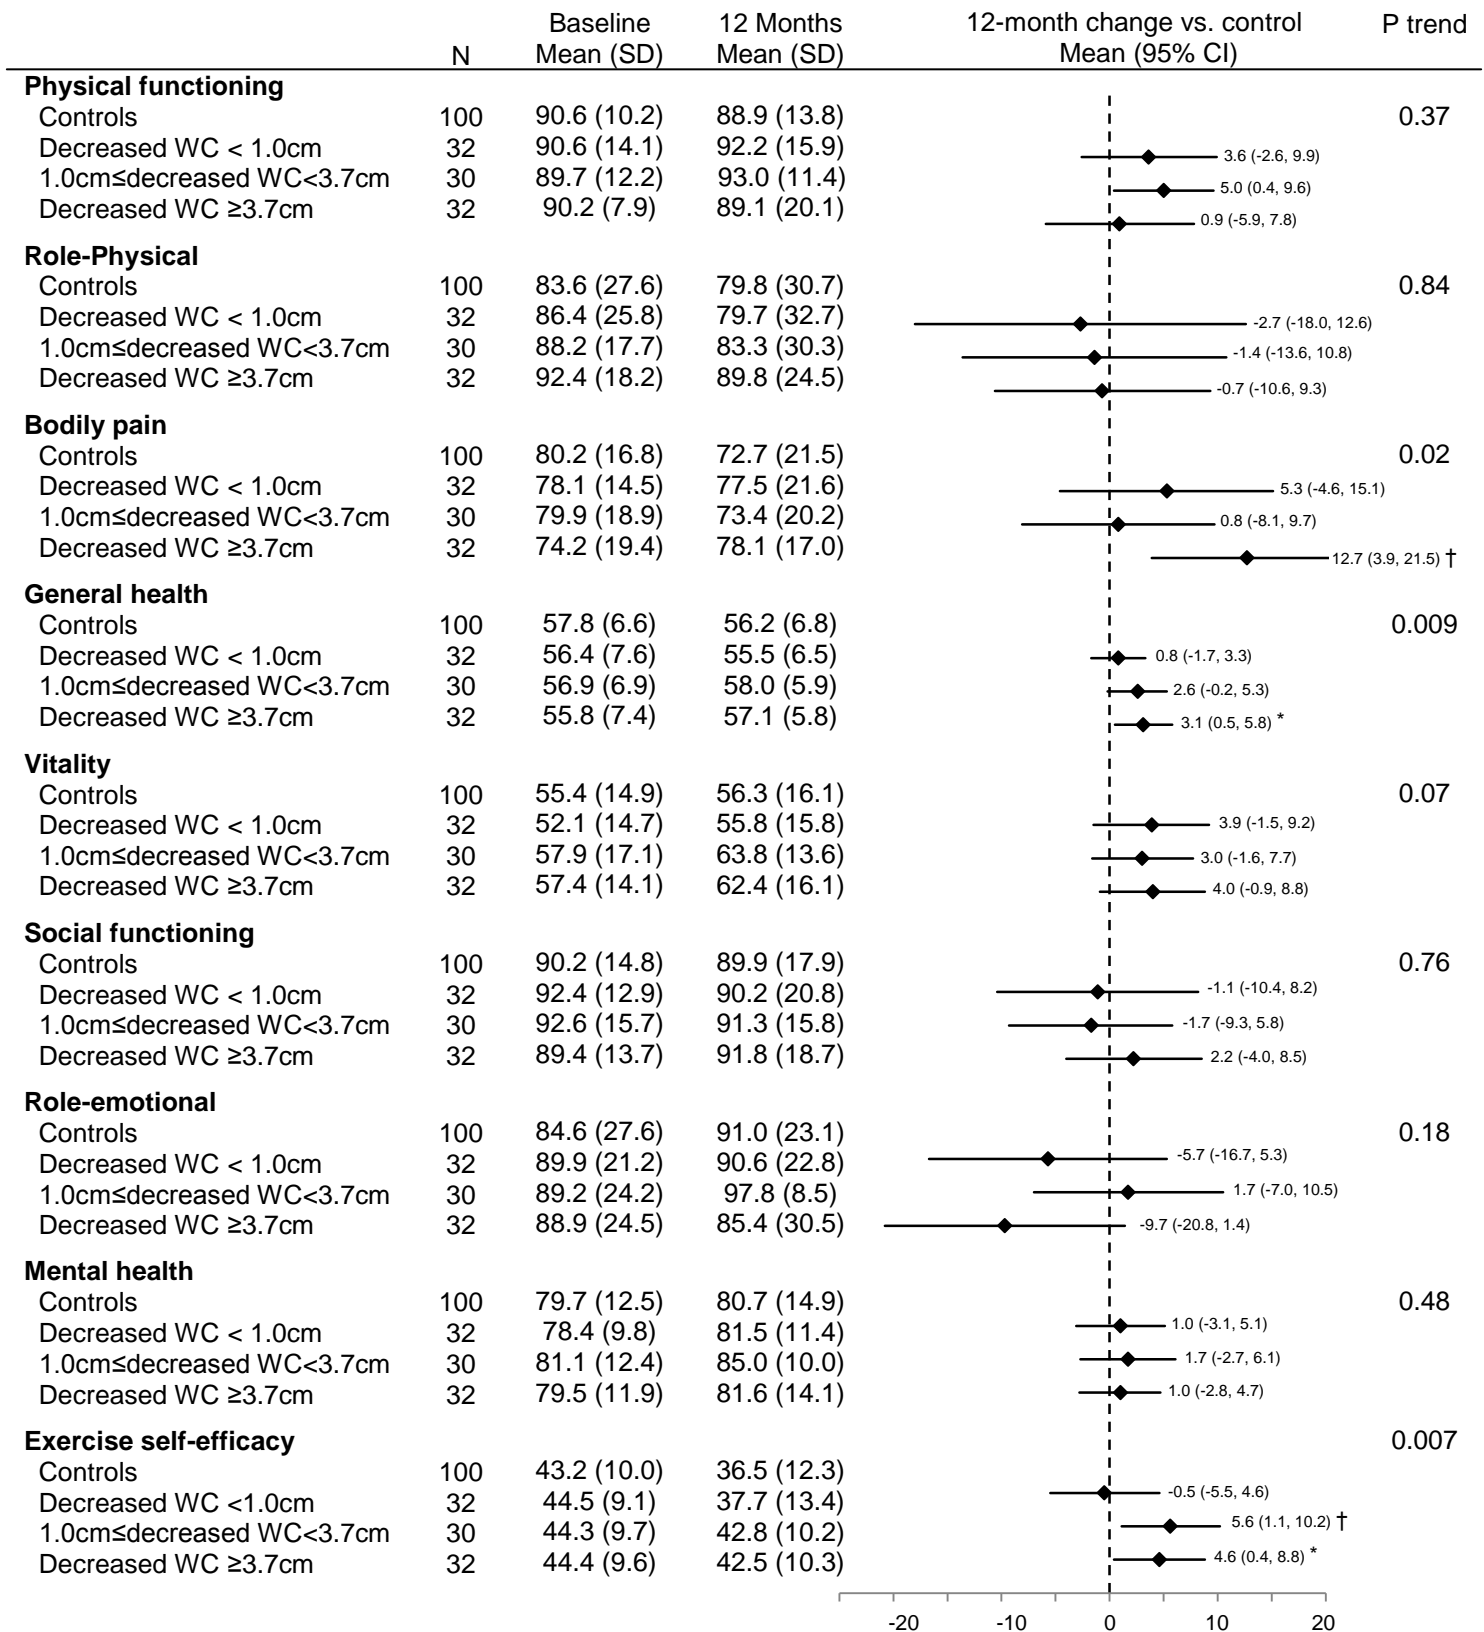

N indicates a number of participants who had 12-month data on health-related quality of life and exercise self-efficacy outcomes. All participants had baseline data on health-related quality of life and exercise self-efficacy outcomes  
P<sub>trend</sub> testing a trend in change from baseline to 12 months across subgroups, adjusting for age, gender, and antidepressant use  
\*: p<0.05, †: p<0.01. P value comparing changes in HRQOL and exercise self-efficacy scores from baseline to 12 months between each adherence subgroup vs. controls, adjusting for age, gender, and antidepressant use

**Supplement figure 5** Baseline and 12-month HRQOL and exercise self-efficacy scores stratified by changes in percent body fat

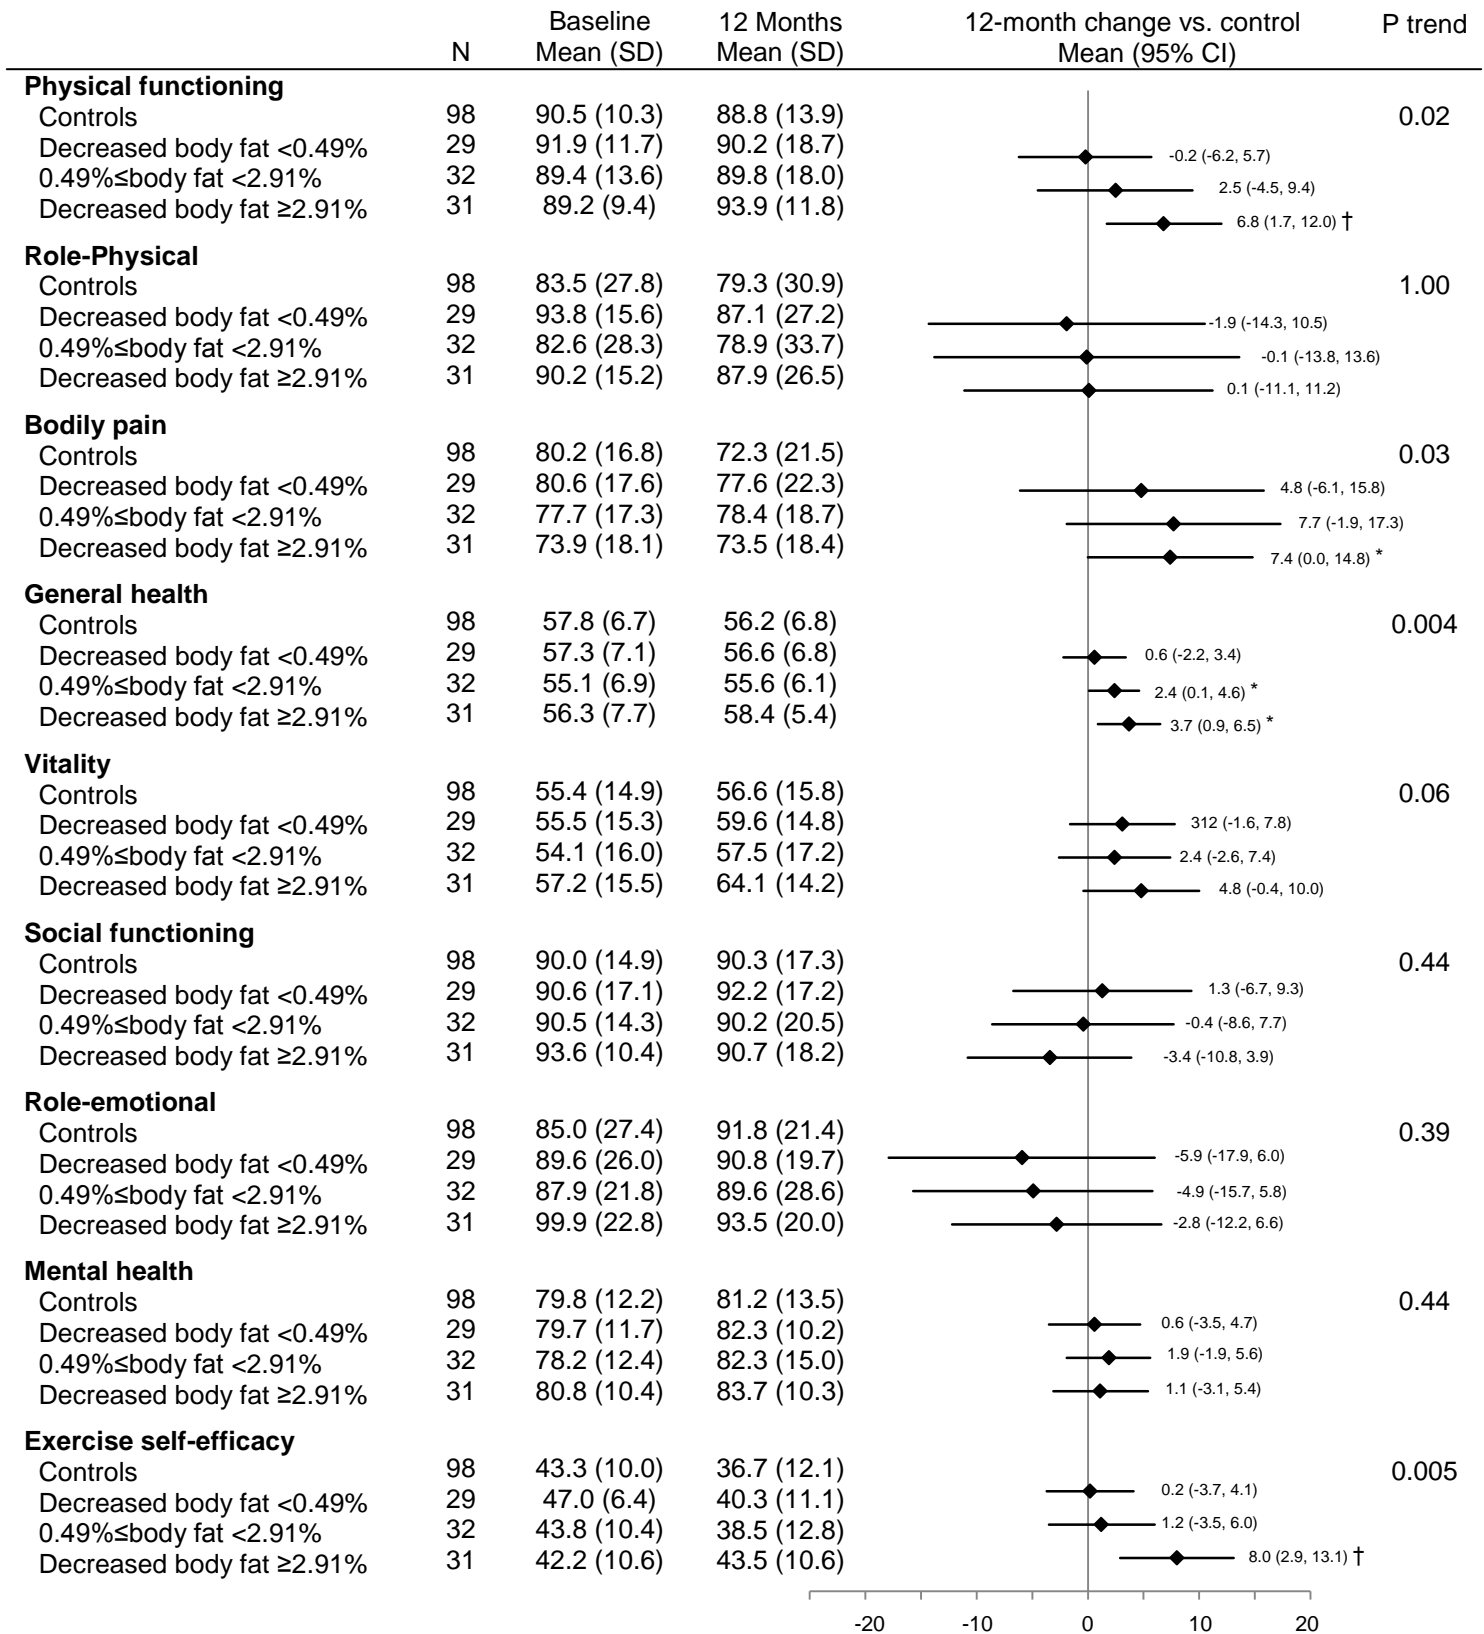

N indicates a number of participants who had 12-month data on health-related quality of life and exercise self-efficacy outcomes. All participants had baseline data on health-related quality of life and exercise self-efficacy outcomes  
P<sub>trend</sub> testing a trend in change from baseline to 12 months across subgroups, adjusting for age, gender, and antidepressant use  
\*: p<0.05, †: p<0.01. P value comparing changes in HRQOL and exercise self-efficacy scores from baseline to 12 months between each adherence subgroup vs. controls, adjusting for age, gender, and antidepressant use
